# Supplementary material
Source: PubMed Central journal article supplement (PMC3641784)
Supplement: NIHMS245309-supplement-1_si_001.pdf [file NIHMS245309-supplement-1_si_001.pdf]

# Supporting Information

## Magnetic Gold Nanoshells: Step-wise Changing of Magnetism through Step-wise Biofunctionalization

Challa S.S.R.Kumar<sup>1\*</sup> and Faruq Mohammad<sup>1,2</sup>

<sup>1</sup>Center for Advanced Microstructures & Devices, Louisiana State University, 6980, Jefferson Highway, Baton Rouge, LA 70806, USA; <sup>2</sup> Environmental Toxicology, Southern University and A&M College, Baton Rouge, LA 70813, USA.

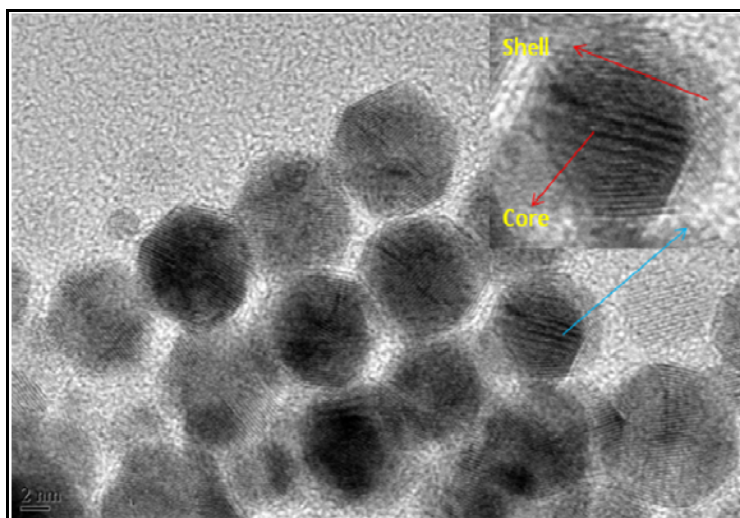

Figure S1. HRTEM image of SPIONs@Au nanoparticles (inset showing the core and shell).

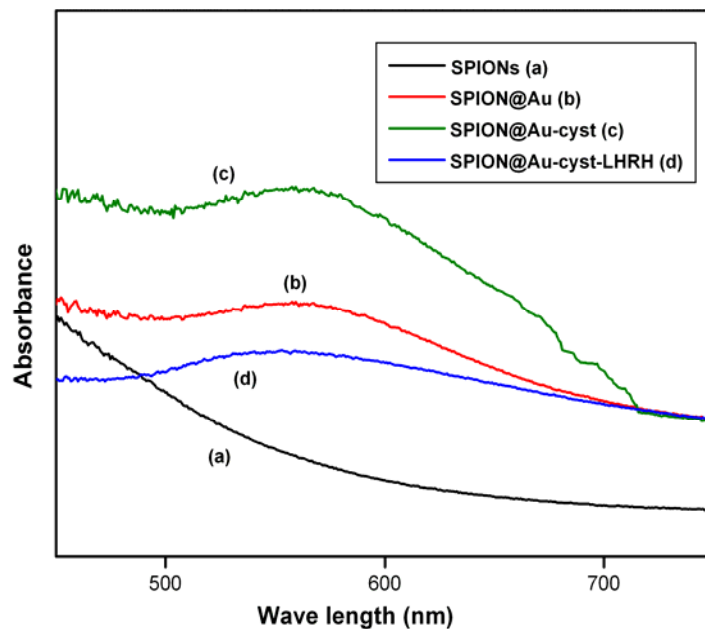

Figure S2. Comparative UV-Visible spectra of SPIONs (a), SPIONs@Au (b) in toluene and SPIONs@Au-Cysteamine (c), SPIONs@Au-Cysteamine-LHRH (d) in water. A clear shift in the SPR band is seen on step-wise biofunctionalization.

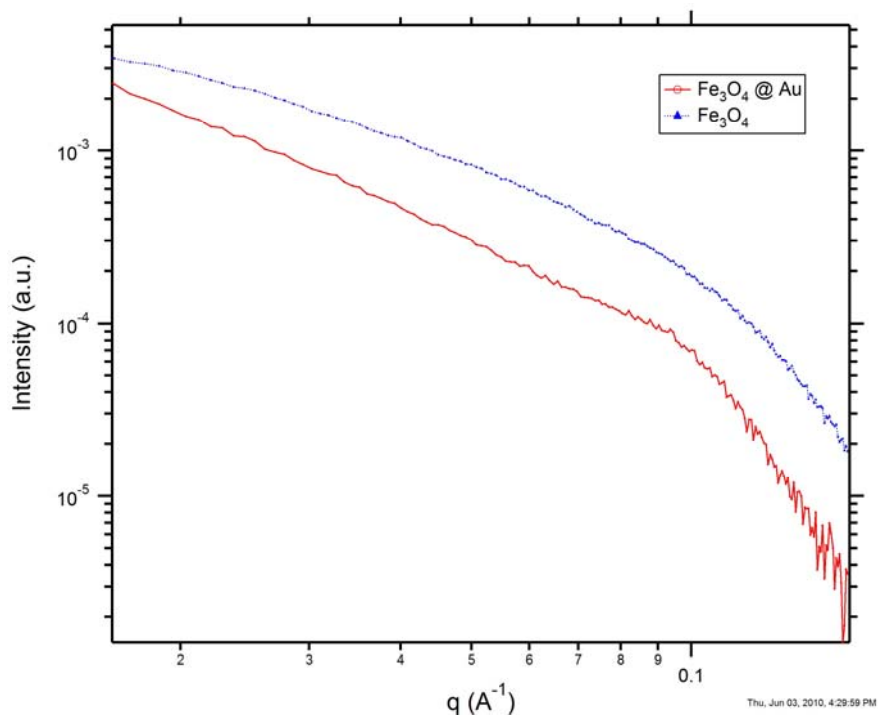

Figure S3: SAXS for SPIONs and SPIONs@Au.

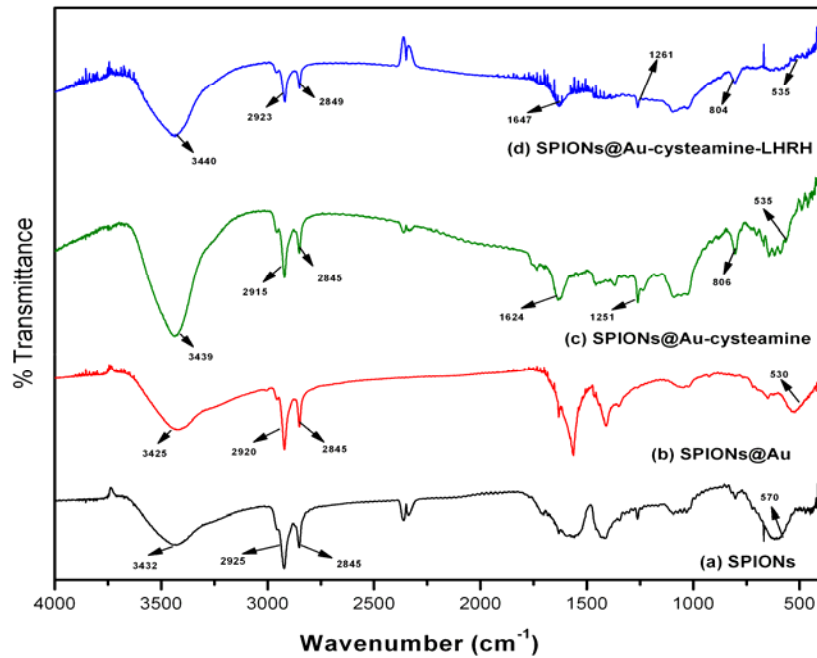

Figure S4. Comparison of FT-IR spectra of SPIONs (a), SPIONs@Au (b), SPIONs@Au-Cysteamine (c) and SPIONs@Au-Cysteamine-LHRH (d).

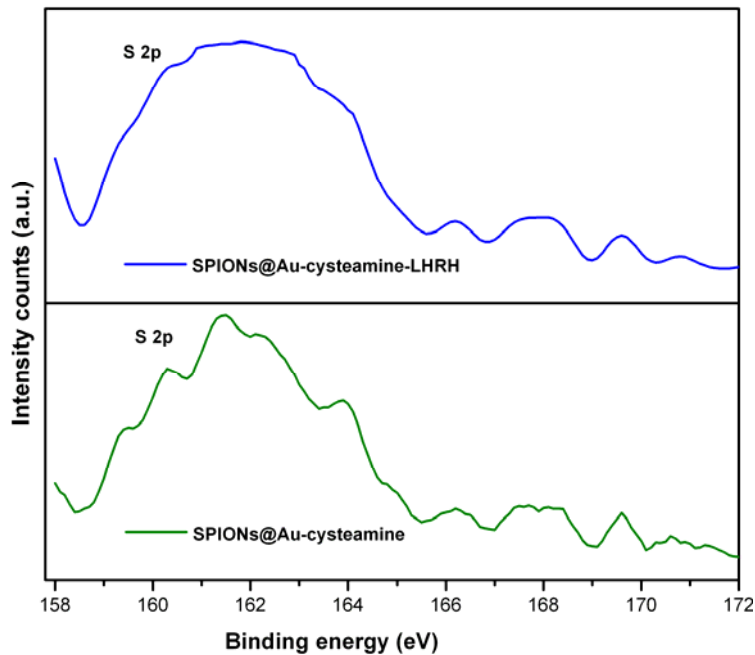

Figure S5. Comparison of XPS (Sulphur 2p) peaks for SPIONs@Au-Cysteamine and SPIONs@Au-Cysteamine-LHRH. The max intensity observed for S 2p peaks are 161.5 eV for cysteamine bound SPIONs@Au and 161.8 eV for SPIONs@Au-Cysteamine-LHRH.

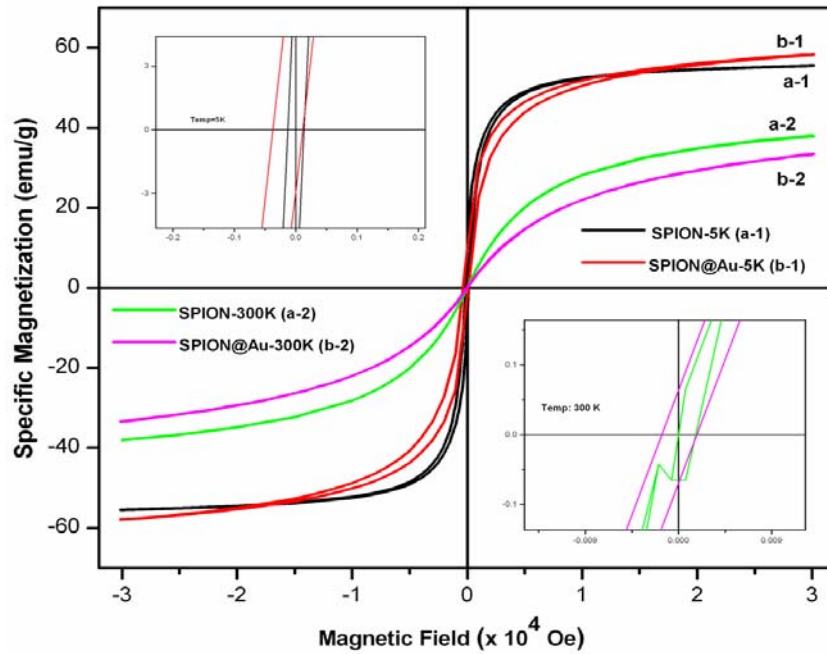

Figure S6. Hysteresis curves for SPIONs (a) and SPIONs@Au (b) at 5 k and 300 K.

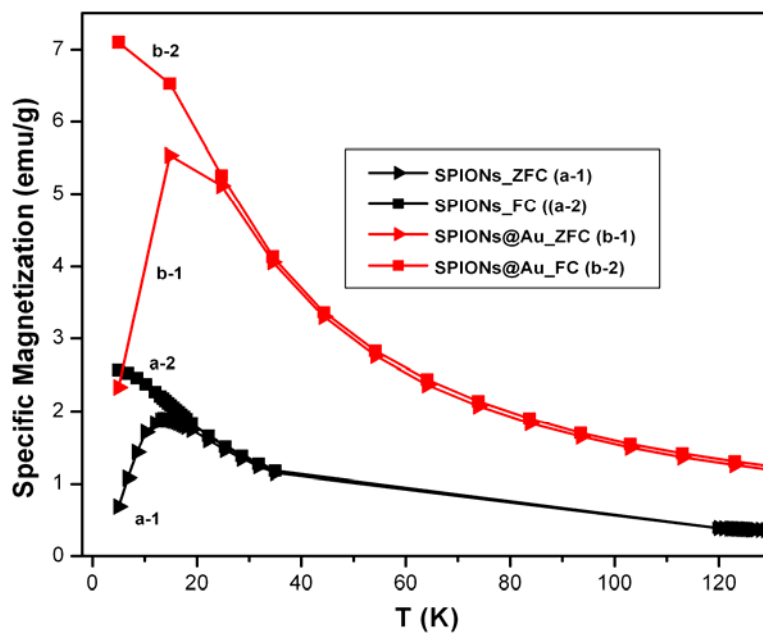

Figure S7. Temperature dependent magnetization: FC and ZFC curves for SPIONs (a) and SPIONs@Au (b).

|                                        | <b>SPIONs</b> | <b>SPIONs@Au</b> | <b>SPIONs@Au-Cysteamine</b> | <b>SPIONs@Au-Cysteamine-LHRH</b> |
|----------------------------------------|---------------|------------------|-----------------------------|----------------------------------|
| <b>M<sub>s</sub> @ 5K</b><br>(emu/g)   | 55.4          | 58               | 84.5                        | 37.7                             |
| <b>M<sub>s</sub>@300K</b><br>(emu/g)   | 38            | 33.2             | 72.7                        | 32.1                             |
| <b>H<sub>C</sub> @ 5K</b><br>(Oe)      | 133           | 115              | 334                         | 325                              |
| <b>M<sub>R</sub> @5K</b><br>(emu/g)    | 4.8           | 8.6              | 21.3                        | 9.6                              |
| <b>H<sub>C</sub> @ 300K</b><br>(Oe)    | 0             | 0                | 0                           | 32                               |
| <b>M<sub>R</sub> @ 300K</b><br>(emu/g) | 0             | 0                | 0                           | 0.4                              |
| <b>T<sub>B</sub> (K)</b>               | 19.1          | 44.3             | 201.5                       | >300                             |

Table S1. Magnetic data for SPIONs, SPIONs@Au, SPIONs@Au-Cysteamine and SPIONs@Au-Cysteamine-LHRH
